# Supplementary material
Source: PubMed Central journal article supplement (PMC6269305)
Supplement: 2018_196782-Disclosures_and_Contributions.pdf [file 2018_196782-Disclosures_and_Contributions.pdf]

Haematologica  
HAEMATOL/2018/196782  
Version 3

Interim PET-directed therapy in limited stage Hodgkin lymphoma  
initially treated with ABVD

Diego Villa, Laurie H Sehn, Christina Aquino-Parsons, Petter Tonseth,  
David W Scott, Alina S Gerrie, Donald Wilson, François Bénard, Randy  
D Gascoyne, Graham W Slack, Pedro Farinha, James Morris, Tom  
Pickles, Joseph M Connors, and Kerry J Savage

Disclosures: DV, LHS, DWS, ASG, JMC, and KJS receive funding from Roche to support the BC Cancer Centre for Lymphoid Cancer Database. DV, ASG, JMC, and KJS have received honoraria from and attended advisory boards for Seattle Genetics. KJS has received honoraria from Takeda.

Contributions: DV, JMC, and KJS designed the research and analyzed data. DV, CAP, PT, JMC, and KJS performed the research. All authors contributed data. DV, JMC, and KJS wrote the paper. All authors reviewed and approved the final manuscript.
